# Supplementary material
Source: HighWire-hosted journal article supplement (https://www.cmaj.ca/highwire/filestream/59204/field_highwire_adjunct_files/1/hpv-smith-2-at.pdf)
Supplement: hpv-smith-2-at.pdf [file hpv-smith-2-at.pdf]

**Appendix 2 (as supplied by the authors): Hypothetical depictions of RDD scenarios\***

**A.**

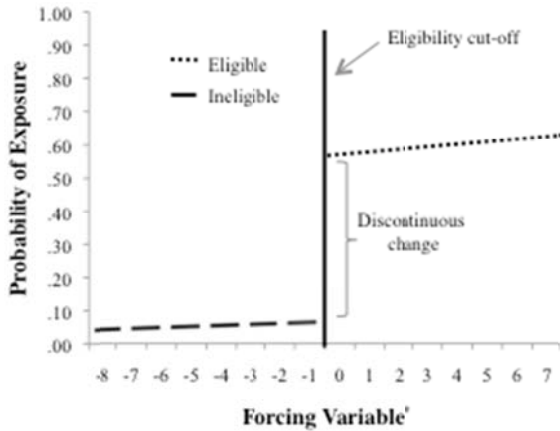

**B.**

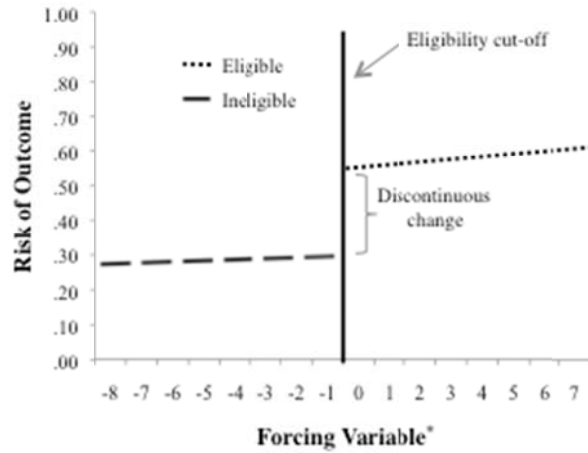

**C.**

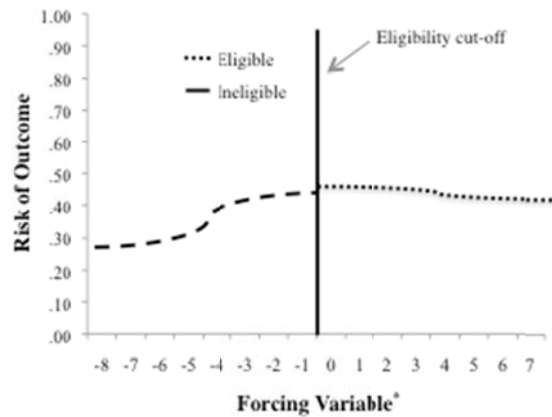

**A. Discontinuity in the probability of exposure at the eligibility cut-off**

**B. Discontinuity in the risk of the outcome at the eligibility cut-off**

**C. Continuity in the risk of the outcome at the eligibility cut-off**

Note: RDD = regression discontinuity design.

\*In these examples, the forcing variable was based on date of birth, which was collapsed into three-month categories and assigned a numerical value. For example, the value of the forcing variable was -1 for cohort members born October 1, 1993 to December 31, 1993 and 0 for cohort members born January 1, 1994 to March 31, 1994.
